# Supplementary material
Source: PubMed Central journal article supplement (PMC3824119)
Supplement: mmc1.pdf [file mmc1.pdf]

The American Journal of Human Genetics, Volume 93

**Supplemental Data**

**The Roles of FMRP-Regulated Genes**

**in Autism Spectrum Disorder:**

**Single- and Multiple-Hit Genetic Etiologies**

**Julia Steinberg and Caleb Webber**

# Haploinsufficiency

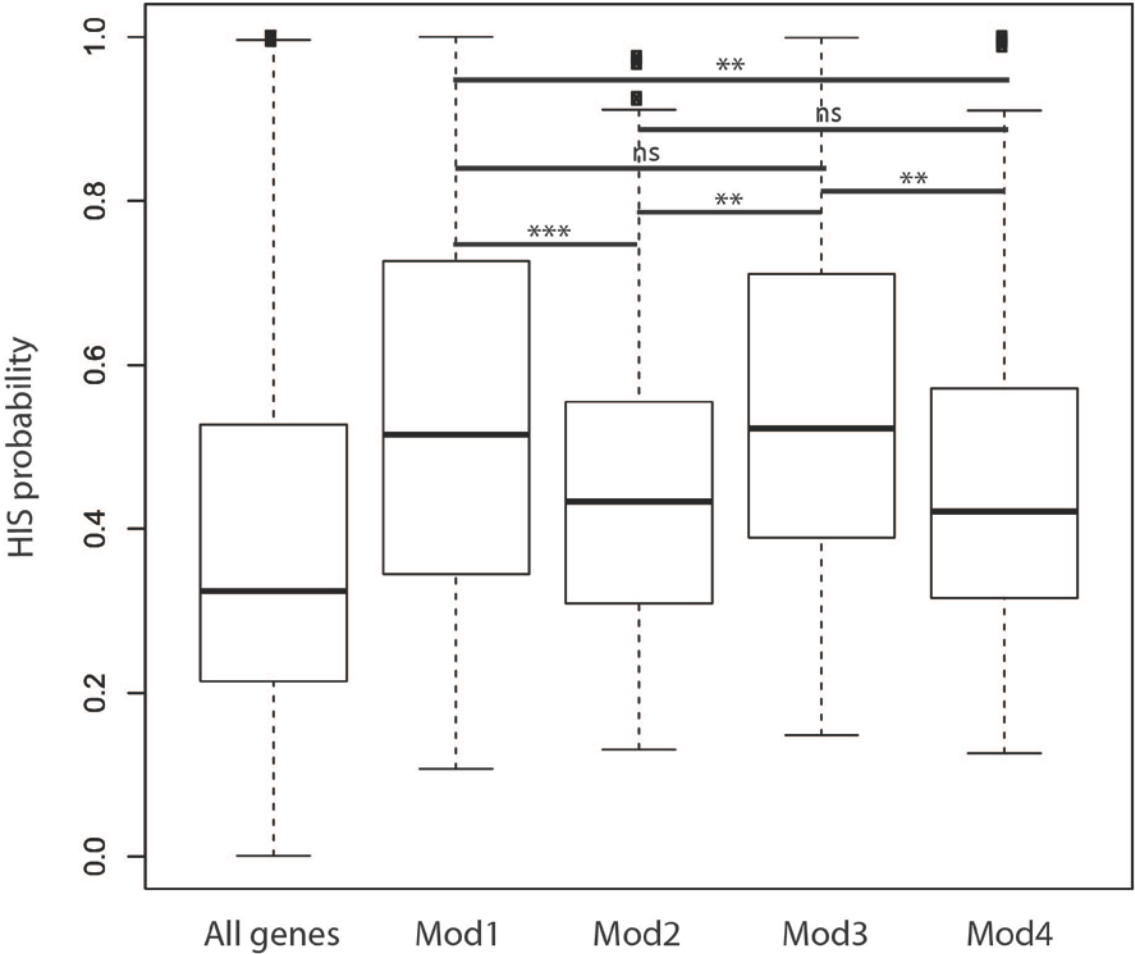

**Figure S1. The distribution of predicted probabilities of haploinsufficiency varies between all genes and FMRP Modules.** The difference in distributions was tested with the Mann-Whitney U-test and is significant between all genes and each of the FMRP Modules.  
ns = not significant; \*\* =  $p < 0.01$ ; \*\*\* =  $p < 10^{-8}$ ; error bars: most extreme point with distance  $\leq 1.5$ -fold interquartile range from the box.

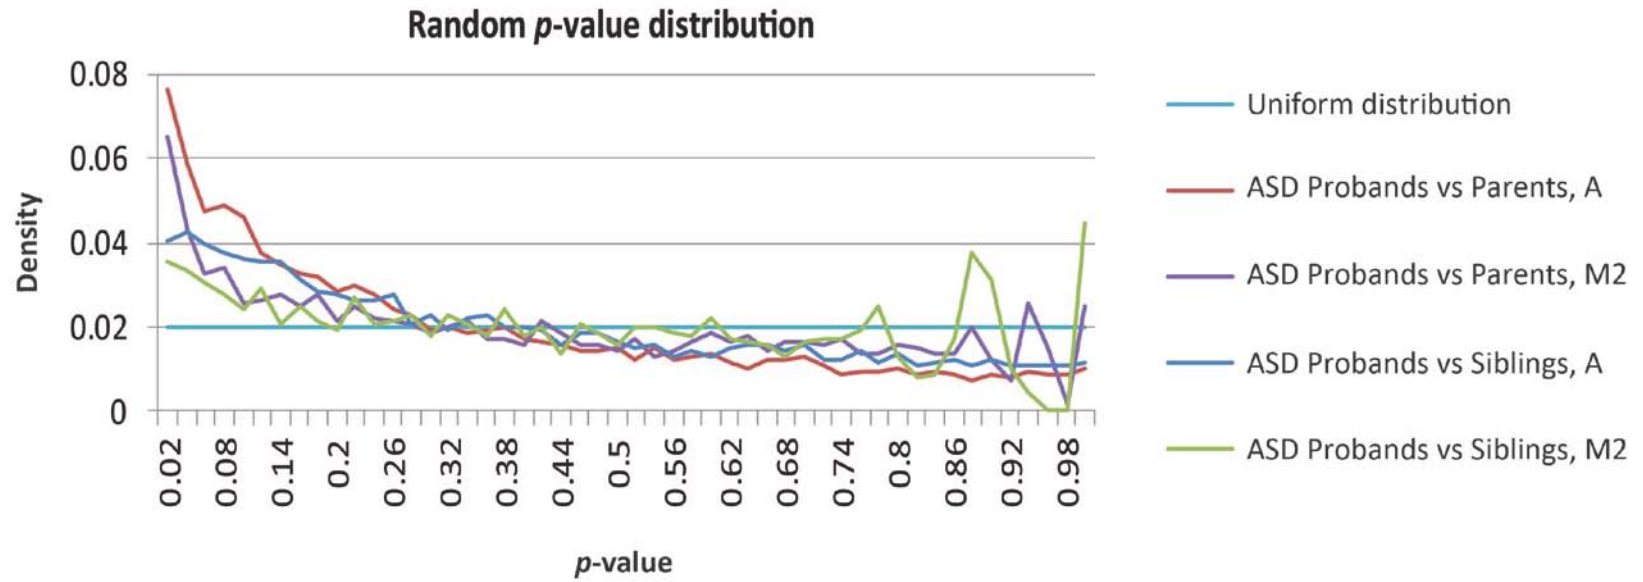

Figure S2. Trend test  $p$ -values for random gene sets matched to all FMRP targets (A) and FMRP Module 2 (M2), using the Sanders datasets (see Methods).

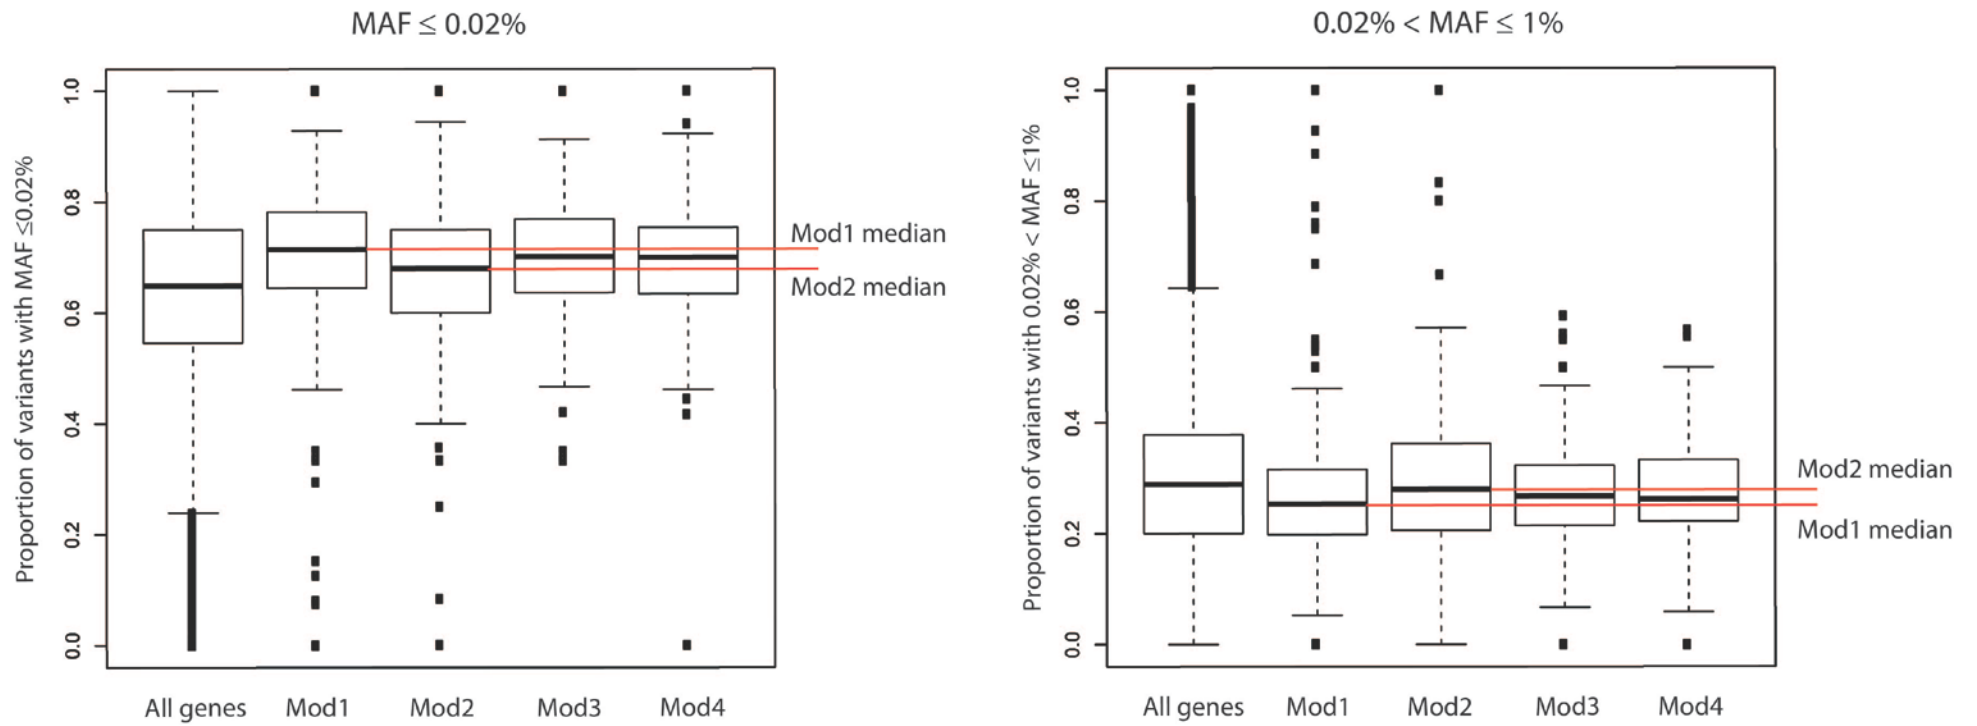

**Figure S3. Differences in proportion of ultrarare (MAF<0.02%) and rare (0.02%≤MAF≤1%) nonsynonymous variants between all genes and FMRP Modules.** Error bars: most extreme point with distance ≤1.5-fold interquartile range from the box.

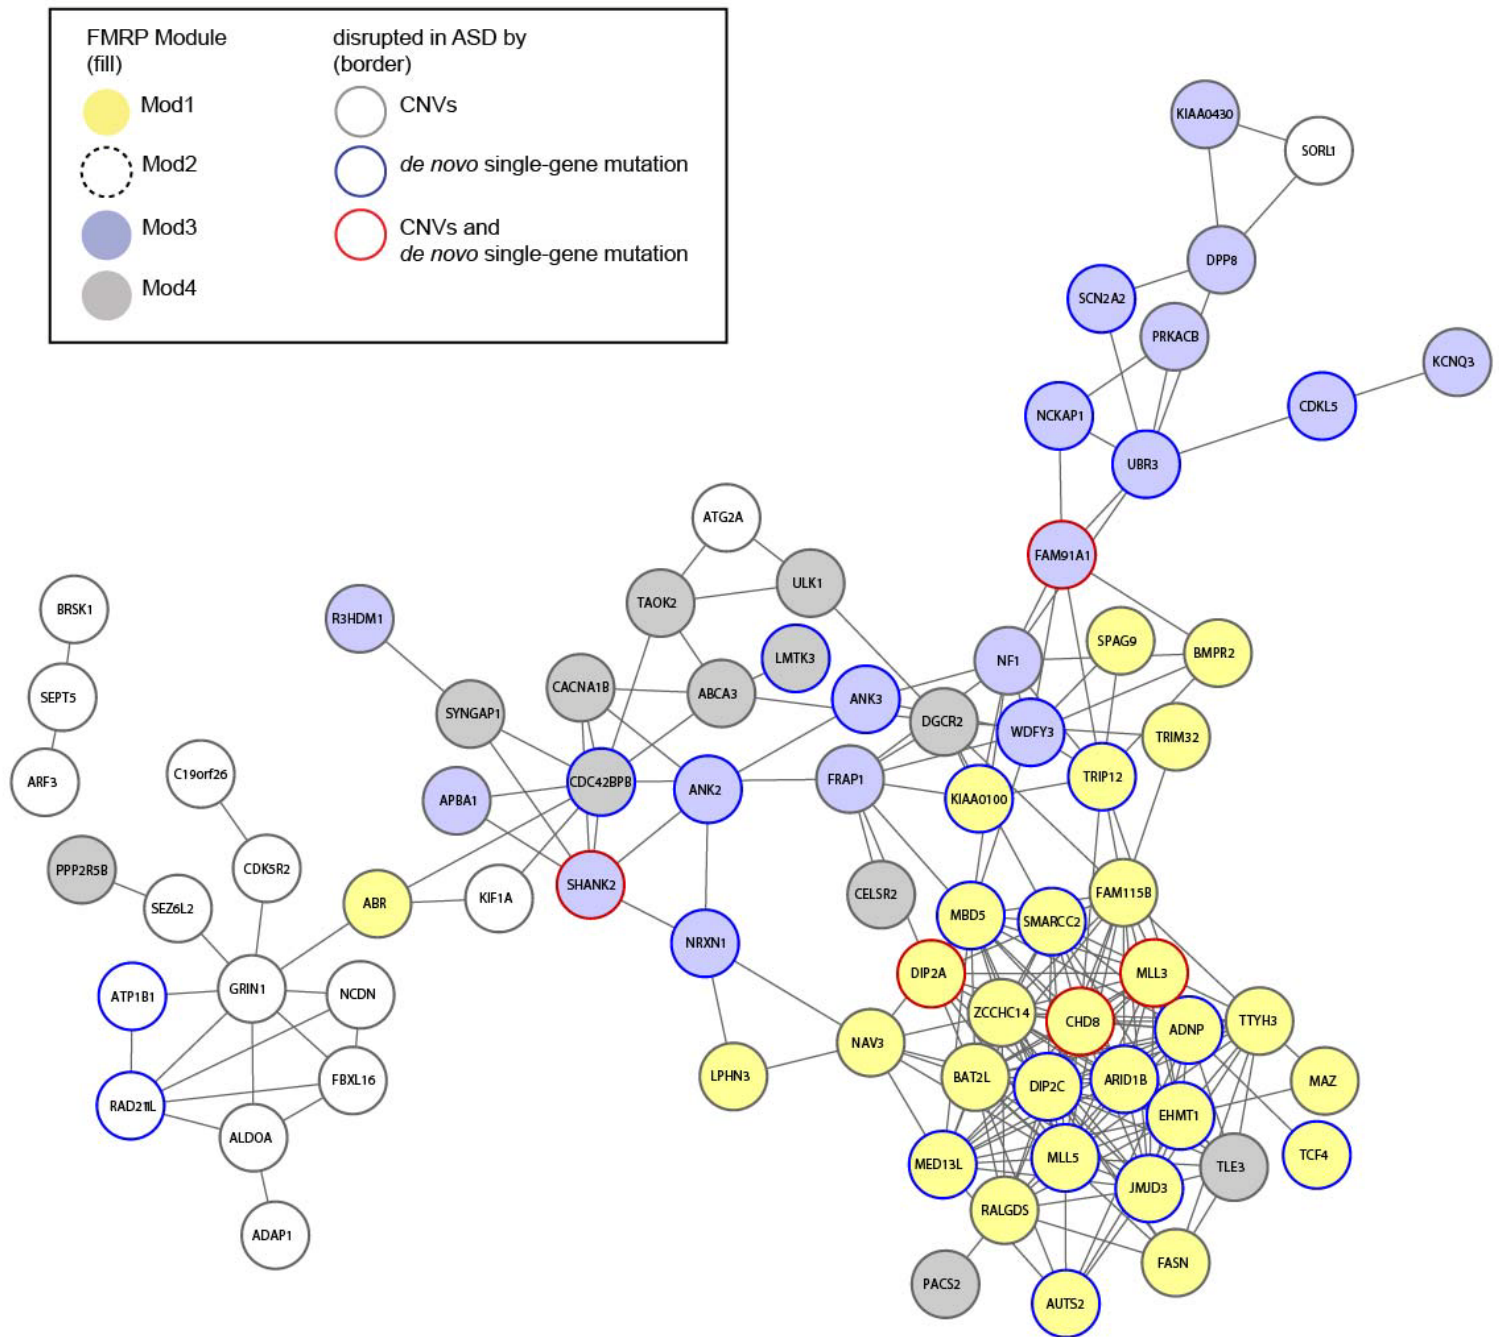

**Figure S4. Brain co-expression network of FMRP targets disrupted in ASD probands by *de novo* single-gene mutations and rare deletion CNVs.** The network confirms the modular pattern with the genes from Modules 3 and 4 linking the more distinct clusters of disrupted genes from Module 1 and, separately, Module 2 (see Appendices). Brain expression was taken from BrainSpan, with links between genes representing a correlation of  $\geq 0.8$ . The disrupted hit reflect the functional enrichments in the modules: The 34 FMRP targets disrupted by damaging *de novo* single-gene mutations are significantly enriched in genes annotated with the GO terms “chromatin modification” (14.1-fold,  $p=4.5 \times 10^{-7}$ ), “regulation of transcription, DNA dependent” (3.2-fold,  $p=6.7 \times 10^{-4}$ ) when compared to both all genes and to all genes disrupted by damaging *de novo* single-gene mutations (**Table S15**). By contrast, the 76 FMRP targets disrupted by rare deletion CNVs are significantly enriched in genes annotated the GO terms “transmission of nerve impulse” (7.2-fold,  $p=1.1 \times 10^{-6}$ ) and “synaptic transmission” (7.6-fold,  $p=2.6 \times 10^{-6}$ ) when compared to the genomic background and to all genes disrupted by rare deletion CNVs in the cohorts from our study (**Table S16**).

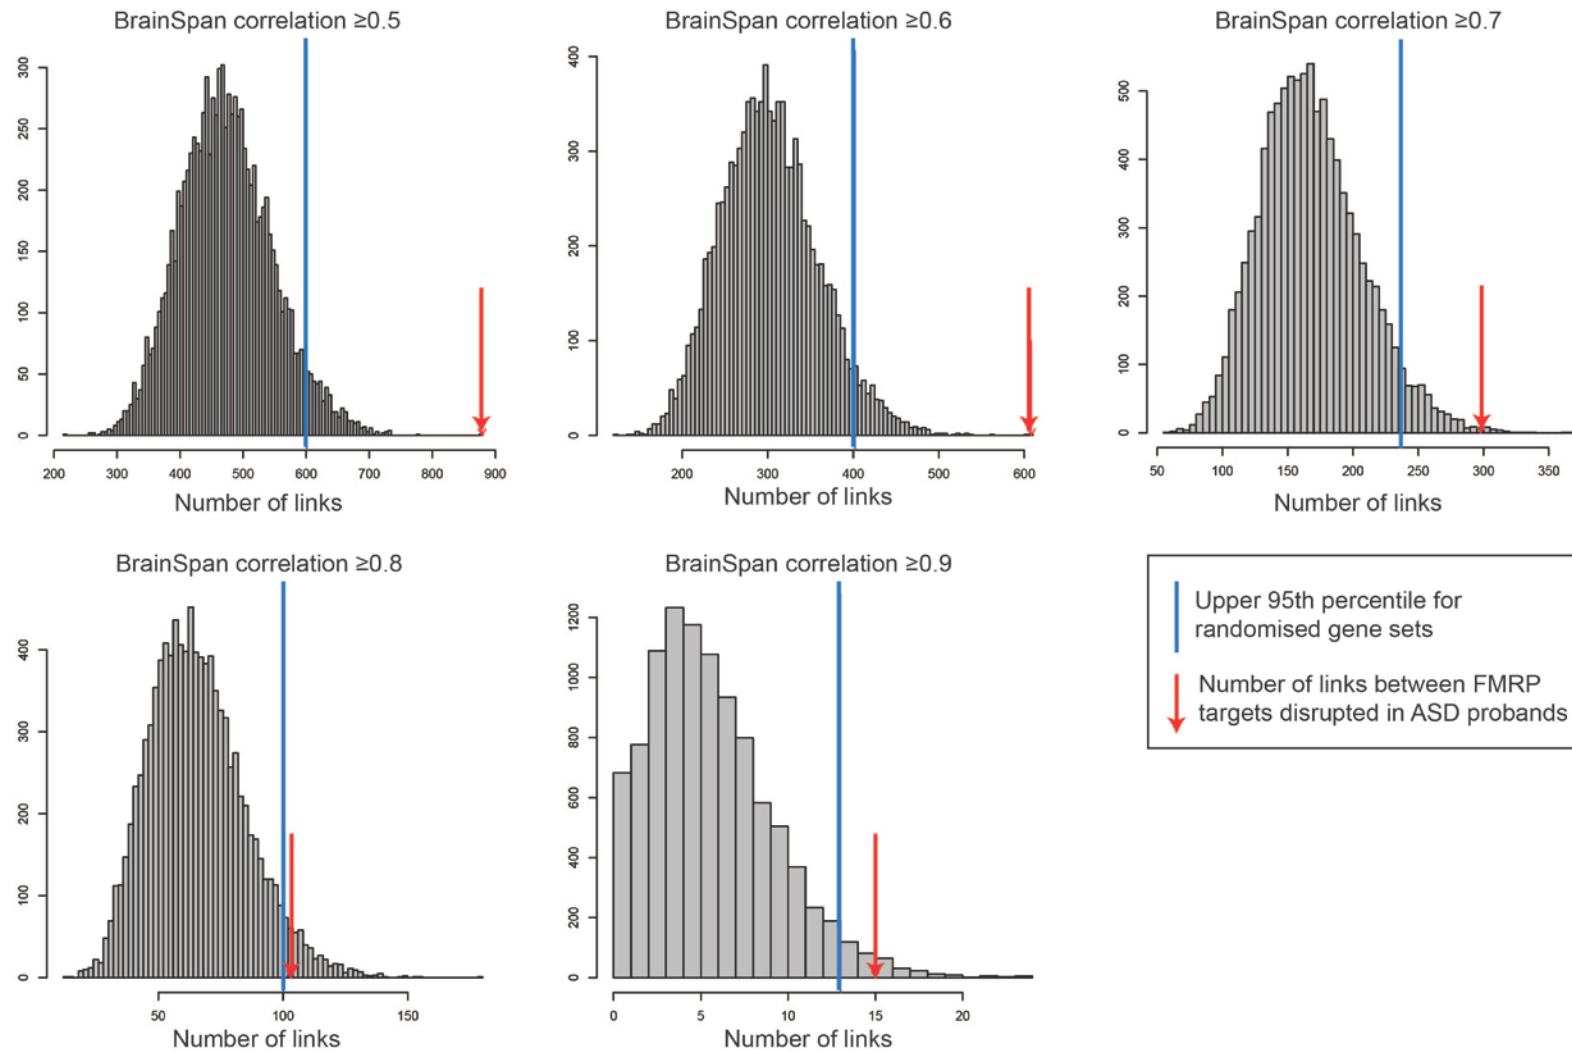

**Figure S5. FMRP targets disrupted in ASD probands by *de novo* single-gene mutations and rare deletion CNVs are significantly co-expressed in the human brain.** A gene co-expression network was constructed from BrainSpan, with genes linked if they were correlated above a threshold of 0.5. Randomised gene sets matched for the number of genes were constructed as described in the **Appendices**. The experiment was repeated with four more stringent correlation thresholds.

| Variation type                                             | Dataset                   | Reference                                                                                                    | Description                                                                       | Analysis                                               |
|------------------------------------------------------------|---------------------------|--------------------------------------------------------------------------------------------------------------|-----------------------------------------------------------------------------------|--------------------------------------------------------|
| <b>De novo nonsense, splice-site, frameshift mutations</b> | I-exomes                  | Iossifov <i>et al.</i> <sup>10</sup>                                                                         | 59 disrupted genes in ASD probands                                                | Enrichment                                             |
|                                                            | SON-exomes                | Sanders <i>et al.</i> <sup>13</sup> , O’Roak <i>et al.</i> <sup>11</sup> , Neale <i>et al.</i> <sup>12</sup> | 65 disrupted genes in ASD probands                                                | Enrichment                                             |
| <b>Breakpoints of balanced chromosomal abnormalities</b>   | T-BCAs                    | Talkowski <i>et al.</i> <sup>24</sup>                                                                        | 32 disrupted genes in ASD probands                                                | Enrichment                                             |
| <b>Rare deletion CNVs</b>                                  | Sanders probands/siblings | Sanders <i>et al.</i> <sup>26</sup>                                                                          | Rare deletion CNVs of 872 ASD probands and matched unaffected siblings            | Trend test                                             |
|                                                            | Sanders probands/parents  | Sanders <i>et al.</i> <sup>26</sup>                                                                          | Rare deletion CNVs of 1124 ASD probands and their parents                         | Trend test                                             |
|                                                            | AGP strict ASD/controls   | Pinto <i>et al.</i> <sup>27</sup>                                                                            | Rare deletion CNVs of 561 probands with “strict ASD” and 1146 unaffected controls | Trend test                                             |
| <b>SNPs</b>                                                | AGRE                      | AGRE; Wang <i>et al.</i> <sup>30</sup>                                                                       | Autosomal SNPs of 1334 ASD cases and 1764 controls (family-based)                 | Transmission disequilibrium test and gene set analysis |

**Table S1 ASD datasets used in the analysis.**

| SNP        | Minor/major allele | p-value (AGRE) Wang <i>et al</i> | tdt p-value          |
|------------|--------------------|----------------------------------|----------------------|
| rs4307059  | C/T                | $1.13 \cdot 10^{-5}$             | $3.44 \cdot 10^{-5}$ |
| rs7704909  | C/T                | $1.63 \cdot 10^{-5}$             | $6.08 \cdot 10^{-5}$ |
| rs12518194 | G/A                | $1.33 \cdot 10^{-5}$             | $2.51 \cdot 10^{-5}$ |
| rs4327572  | T/C                | $2.23 \cdot 10^{-5}$             | $4.19 \cdot 10^{-5}$ |
| rs1896731  | C/T                | $1.73 \cdot 10^{-3}$             | 0.01374              |
| rs10038113 | C/T                | $1.43 \cdot 10^{-3}$             | 0.0181               |

**Table S2 Results from the transmission disequilibrium (tdt) test for AGRE data compared to analysis of highly overlapping cohort by Wang *et al*.**

| Foetal tissues | Adult tissues              |
|----------------|----------------------------|
| Brain          | Atrioventricular node      |
| Liver          | Adipocyte                  |
| Lung           | Adrenal cortex             |
| Thyroid        | Adrenal gland              |
|                | Appendix                   |
|                | Bronchial epithelial cells |
|                | Cardiac myocytes           |
|                | Heart                      |
|                | Kidney                     |
|                | Liver                      |
|                | Lung                       |
|                | Ovary                      |
|                | Pancreas                   |
|                | Pancreatic Islets          |
|                | Pituitary gland            |
|                | Placenta                   |
|                | Prostate                   |
|                | Salivary gland             |
|                | Skeletal muscle            |
|                | Skin                       |
|                | Smooth muscle              |
|                | Testis                     |
|                | Testis Germ cell           |
|                | Thymus                     |
|                | Thyroid                    |
|                | Tongue                     |
|                | Trachea                    |
|                | Uterus                     |
|                | Uterus corpus              |
|                | Whole blood                |
|                | Whole brain                |

**Table S3 Foetal and adult tissues used to determine tissue-specificity of genes.**



| Gene list    | Adult                             |                                  |                                                 |                                    |
|--------------|-----------------------------------|----------------------------------|-------------------------------------------------|------------------------------------|
|              | Intercept                         | BrainSpec <sub>adult</sub>       | CDS                                             | FMRP                               |
| I-exomes     | -6.09<br>( $<2 \times 10^{-16}$ ) | $-7.24 \times 10^{-3}$<br>(0.80) | $7.09 \times 10^{-5}$<br>(0.001)                | 1.84<br>( $7.85 \times 10^{-9}$ )  |
| SON-exomes   | -5.79<br>( $<2 \times 10^{-16}$ ) | -0.16<br>(0.14)                  | $6.16 \times 10^{-5}$<br>(0.001)                | 1.80<br>( $8.23 \times 10^{-8}$ )  |
| T-BCAs       | -6.56<br>( $<2 \times 10^{-16}$ ) | -0.12<br>(0.35)                  | $5.02 \times 10^{-5}$<br>(0.019)                | 2.06<br>( $2.58 \times 10^{-6}$ )  |
| All combined | -5.20<br>( $<2 \times 10^{-16}$ ) | -0.038<br>(0.31)                 | $1.22 \times 10^{-4}$<br>( $7 \times 10^{-7}$ ) | 1.62<br>( $9.61 \times 10^{-13}$ ) |
| Gene list    | Foetal                            |                                  |                                                 |                                    |
|              | Intercept                         | BrainSpec <sub>foetal</sub>      | CDS                                             | FMRP                               |
| I-exomes     | -6.10<br>( $<2 \times 10^{-16}$ ) | $2.95 \times 10^{-3}$<br>(0.67)  | $7.14 \times 10^{-5}$<br>(0.001)                | 1.81<br>( $4.97 \times 10^{-9}$ )  |
| SON-exomes   | -5.90<br>( $<2 \times 10^{-16}$ ) | -0.055<br>(0.47)                 | $6.41 \times 10^{-5}$<br>(0.001)                | 1.66<br>( $6.31 \times 10^{-7}$ )  |
| T-BCAs       | -6.71<br>( $<2 \times 10^{-16}$ ) | $5.23 \times 10^{-3}$<br>(0.1)   | $5.23 \times 10^{-5}$<br>(0.012)                | 1.86<br>( $7.69 \times 10^{-6}$ )  |
| All combined | -5.26<br>( $<2 \times 10^{-16}$ ) | $3.91 \times 10^{-3}$<br>(0.25)  | $1.27 \times 10^{-4}$<br>( $2 \times 10^{-7}$ ) | 1.53<br>( $1.79 \times 10^{-12}$ ) |

**Table S4** Logistic regression shows that after accounting for relative brain specificity and length of coding sequence (CDS; in base pairs), being targeted by FMRP significantly increases the probability of a gene to be found disrupted by a single-gene *de novo* mutation in ASD based on three such lists and their combination. Table shows the coefficients from logistic regression, with *p*-values in parentheses.

| Gene Ontology gene set                                  | Enrichment $p$ -value  | Fold enrichment | Module 1 genes in gene set | FMRP targets in gene set |
|---------------------------------------------------------|------------------------|-----------------|----------------------------|--------------------------|
| transcription (BP,0006350)                              | $8.84 \times 10^{-12}$ | 1.85            | 71                         | 114                      |
| regulation of transcription (BP,0045449)                | $3.88 \times 10^{-9}$  | 1.65            | 77                         | 139                      |
| chromatin modification (BP,0016568)                     | $7.73 \times 10^{-9}$  | 2.26            | 32                         | 42                       |
| chromatin organization (BP,0006325)                     | $2.11 \times 10^{-8}$  | 2.21            | 32                         | 43                       |
| chromosome organization (BP,0051276)                    | $2.29 \times 10^{-8}$  | 2.18            | 33                         | 45                       |
| nucleoplasm part (CC,0044451)                           | $3.01 \times 10^{-7}$  | 2.07            | 32                         | 46                       |
| regulation of transcription, DNA dependent (BP,0006355) | $5.59 \times 10^{-7}$  | 1.66            | 57                         | 102                      |
| regulation of RNA metabolic process (BP,0051252)        | $5.59 \times 10^{-7}$  | 1.66            | 57                         | 102                      |

**Table S5** 8 GO biological processes (BP) and cellular component (CC) gene sets most significantly enriched among FMRP Module 1, with all FMRP targets as background. All shown enrichments are significant at 5% FDR (Benjamini-Hochberg).

| MGI phenotype                             | Enrichment $p$ -value | Fold enrichment | Module 2 genes annotated with phenotype | FMRP targets annotated with phenotype |
|-------------------------------------------|-----------------------|-----------------|-----------------------------------------|---------------------------------------|
| <i>abnormal synaptic transmission</i>     | $2.5 \times 10^{-6}$  | 1.51            | 57                                      | 121                                   |
| <i>abnormal CNS synaptic transmission</i> | $9.90 \times 10^{-6}$ | 1.53            | 51                                      | 107                                   |
| <i>abnormal synaptic depression</i>       | $6.26 \times 10^{-5}$ | 2.07            | 20                                      | 31                                    |
| <i>abnormal nervous system physiology</i> | 0.0002                | 1.23            | 80                                      | 209                                   |
| <i>convulsive seizures</i>                | 0.0005                | 1.81            | 22                                      | 39                                    |

**Table S6** MGI nervous system and behaviour/neurological subphenotypes significantly enriched among FMRP Module 2 genes at 5% FDR (Benjamini-Hochberg), with all FMRP targets as background.

| Gene Ontology gene set           | Enrichment $p$ -value | Fold enrichment | Module 2 genes in gene set | FMRP targets in gene set |
|----------------------------------|-----------------------|-----------------|----------------------------|--------------------------|
| synapse part (CC,0044456)        | $4.90 \times 10^{-6}$ | 2.01            | 30                         | 51                       |
| synapse (CC,0045202)             | $6.41 \times 10^{-6}$ | 1.77            | 41                         | 79                       |
| plasma membrane (CC,0005886)     | $1.08 \times 10^{-5}$ | 1.33            | 107                        | 276                      |
| cation transport (BP,0006812)    | $1.93 \times 10^{-5}$ | 1.85            | 33                         | 61                       |
| metal ion transport (BP,0030001) | $2.44 \times 10^{-5}$ | 1.90            | 30                         | 54                       |
| ion transport (BP,0006811)       | $5.21 \times 10^{-5}$ | 1.73            | 36                         | 71                       |
| cell junction (CC,0030054)       | 0.0002                | 1.64            | 37                         | 77                       |
| membrane fraction (CC,0005624)   | 0.0003                | 1.59            | 39                         | 84                       |

**Table S7** 8 GO biological processes and cellular components gene sets most significantly enriched among FMRP Module 2, with all FMRP targets as background. All shown enrichments are significant at 5% FDR (Benjamini-Hochberg).

| Variants                                                   | MAF      | Mann-Whitney U-test <i>p</i> -value |                               |                              |
|------------------------------------------------------------|----------|-------------------------------------|-------------------------------|------------------------------|
|                                                            |          | FMRP Module 1<br>vs all genes       | FMRP Module 2<br>vs all genes | FMRP Module 1<br>vs Module 2 |
| All variants                                               | <0.02%   | 4.69×10 <sup>-10</sup>              | 0.3408                        | 7.83×10 <sup>-6</sup>        |
|                                                            | 0.02%-1% | 0.001                               | 0.2617                        | 9.40×10 <sup>-5</sup>        |
|                                                            | >1%      | 0.00016                             | 0.02515                       | 0.2478                       |
| Missense, splice,<br>introducing/removing<br>stop codon    | <0.02%   | 4.75×10 <sup>-14</sup>              | 0.0004104                     | 0.003439                     |
|                                                            | 0.02%-1% | 1.99×10 <sup>-6</sup>               | 0.5304                        | 0.003101                     |
|                                                            | >1%      | 0.0005735                           | 5.63×10 <sup>-5</sup>         | 0.4649                       |
| Polyphen “possibly<br>damaging” and<br>“probably damaging” | <0.02%   | 1.00×10 <sup>-06</sup>              | 0.005737                      | 0.164                        |
|                                                            | 0.02%-1% | 0.001202                            | 0.15                          | 0.2124                       |
|                                                            | >1%      | 0.1177                              | 0.03083                       | 0.4569                       |

**Table S8** Differences in proportion of ultra-rare (MAF<0.002%), rare (0.002%≤MAF≤1%) and common (MAF>1%) variants between all genes, FMRP Modules 1 and 2. Yellow: significant at 5% FDR (correction for the number of tests in each variant classification).

| FMRP gene set                 | I-exomes (59 genes)        |                        |                 | SON-exomes (65 genes)                             |                        |                 |
|-------------------------------|----------------------------|------------------------|-----------------|---------------------------------------------------|------------------------|-----------------|
|                               | Number of genes in overlap | Enrichment $p$ -value  | Fold enrichment | Number of genes in overlap                        | Enrichment $p$ -value  | Fold enrichment |
| All FMRP targets <sup>a</sup> | 15                         | $6.07 \times 10^{-7b}$ | 4.53            | 13                                                | $5.49 \times 10^{-5b}$ | 3.56            |
| Module 3                      | 6                          | $1.16 \times 10^{-7b}$ | 11.73           | 3                                                 | 0.0188 <sup>b</sup>    | 5.33            |
| Module 1 <sup>a</sup>         | 6                          | 0.0009 <sup>b</sup>    | 5.32            | 7                                                 | 0.0002 <sup>b</sup>    | 5.63            |
| Module 2                      | 2                          | 0.2420                 | 2.13            | 0                                                 | 1                      | -1.00           |
| Module 4                      | 1                          | 0.3780                 | 2.12            | 1                                                 | 0.4074                 | 1.92            |
| FMRP gene set                 | T-BCAs (32 genes)          |                        |                 | T-BCAs without overlap with SON-exomes (29 genes) |                        |                 |
|                               | Number of genes in overlap | Enrichment $p$ -value  | Fold enrichment | Number of genes in overlap                        | Enrichment $p$ -value  | Fold enrichment |
| All FMRP targets <sup>a</sup> | 8                          | 0.0003 <sup>b</sup>    | 4.45            | 6                                                 | 0.0048 <sup>b</sup>    | 3.68            |
| Module 3                      | 2                          | 0.0312                 | 7.21            | 2                                                 | 0.0260                 | 7.96            |
| Module 1 <sup>a</sup>         | 6                          | $2.78 \times 10^{-5b}$ | 9.80            | 4                                                 | 0.0021 <sup>b</sup>    | 7.21            |
| Module 2                      | 0                          | 1                      | -1.00           | 0                                                 | 1                      | -1.00           |
| Module 4                      | 0                          | 1                      | -1.00           | 0                                                 | 1                      | -1.00           |

**Table S9 ASD *de novo* single-gene disruptions are significantly enriched in FMRP targets, particularly in Module 1 genes.**

<sup>a</sup> = gene set significantly enriched in I-exomes, SON-exomes and T-BCAs; <sup>b</sup> = enrichment significant at 5% FDR (Benjamini-Hochberg)

| Dataset      | Intercept                         | CDS                                                | Mod1                               | Mod2            | Mod3                               | Mod4            |
|--------------|-----------------------------------|----------------------------------------------------|------------------------------------|-----------------|------------------------------------|-----------------|
| I-exomes     | -6.10<br>( $<2 \times 10^{-16}$ ) | $6.77 \times 10^{-5}$<br>( $8 \times 10^{-4}$ )    | 1.94<br>( $1.29 \times 10^{-5}$ )  | 1.14<br>(0.12)  | 2.72<br>( $2.72 \times 10^{-9}$ )  | 1.04<br>(0.31)  |
| SON-exomes   | -5.93<br>( $<2 \times 10^{-16}$ ) | $6.35 \times 10^{-5}$<br>(0.001)                   | 1.96<br>( $2.17 \times 10^{-6}$ )  | -1.28<br>(0.98) | 1.86<br>(0.002)                    | 0.90<br>(0.38)  |
| T-BCAs       | -6.70<br>( $<2 \times 10^{-16}$ ) | $4.95 \times 10^{-5}$<br>(0.03)                    | 2.64<br>( $1.66 \times 10^{-8}$ )  | -1.3<br>(0.99)  | 2.30<br>(0.002)                    | -1.31<br>(0.99) |
| All combined | -5.22<br>( $<2 \times 10^{-16}$ ) | $1.18 \times 10^{-4}$<br>( $2.41 \times 10^{-6}$ ) | 1.88<br>( $3.34 \times 10^{-10}$ ) | 0.092<br>(0.90) | 2.20<br>( $3.97 \times 10^{-10}$ ) | 0.62<br>(0.39)  |

**Table S10 Logistic regression shows that after accounting for relative brain specificity and length of coding sequence (CDS; in base pairs), being targeted by FMRP significantly increases the probability of a gene to be found disrupted by a single-gene *de novo* mutation in ASD based on three such lists and their combination. Table shows the coefficients from logistic regression, with  $p$ -values in parentheses.**

| a) 800 cases, 800 controls |                             |                             |                              |                              |                              |                              |
|----------------------------|-----------------------------|-----------------------------|------------------------------|------------------------------|------------------------------|------------------------------|
| Fisher's test              | OR                          |                             |                              |                              |                              |                              |
| Controls with 1+ hits      | 1.5                         | 2.0                         | 2.5                          | 3.0                          | 3.5                          | 4.0                          |
| 10                         | 4.21×10 <sup>-1</sup>       | 9.56×10 <sup>-2</sup>       | 1.55×10 <sup>-2</sup>        | 1.96×10 <sup>-3</sup>        | 2.03×10 <sup>-4</sup>        | 1.79×10 <sup>-5</sup>        |
| 20                         | 1.95×10 <sup>-1</sup>       | 1.18×10 <sup>-2</sup>       | 3.28×10 <sup>-4</sup>        | 5.08×10 <sup>-6</sup>        | <b>4.99×10<sup>-8</sup></b>  | <b>3.39×10<sup>-10</sup></b> |
| 30                         | 9.72×10 <sup>-2</sup>       | 1.52×10 <sup>-3</sup>       | 6.67×10 <sup>-6</sup>        | <b>1.12×10<sup>-8</sup></b>  | <b>8.82×10<sup>-12</sup></b> | <b>3.70×10<sup>-15</sup></b> |
| 40                         | 4.92×10 <sup>-2</sup>       | 1.91×10 <sup>-4</sup>       | 1.20×10 <sup>-7</sup>        | <b>1.91×10<sup>-11</sup></b> | <b>9.90×10<sup>-16</sup></b> | <b>2.00×10<sup>-20</sup></b> |
| 50                         | 2.50×10 <sup>-2</sup>       | 2.28×10 <sup>-5</sup>       | <b>1.86×10<sup>-9</sup></b>  | <b>2.37×10<sup>-14</sup></b> | <b>6.53×10<sup>-20</sup></b> | <b>4.80×10<sup>-26</sup></b> |
| 60                         | 1.27×10 <sup>-2</sup>       | 2.54×10 <sup>-6</sup>       | <b>2.40×10<sup>-11</sup></b> | <b>2.06×10<sup>-17</sup></b> | <b>2.37×10<sup>-24</sup></b> | <b>4.55×10<sup>-32</sup></b> |
| 70                         | 6.33×10 <sup>-3</sup>       | 2.62×10 <sup>-7</sup>       | <b>2.53×10<sup>-13</sup></b> | <b>1.21×10<sup>-20</sup></b> | <b>4.36×10<sup>-29</sup></b> | <b>1.50×10<sup>-38</sup></b> |
| 80                         | 3.12×10 <sup>-3</sup>       | 2.49×10 <sup>-8</sup>       | <b>2.14×10<sup>-15</sup></b> | <b>4.56×10<sup>-24</sup></b> | <b>3.77×10<sup>-34</sup></b> | <b>1.48×10<sup>-45</sup></b> |
| Trend test                 |                             |                             |                              |                              |                              |                              |
| OR                         |                             |                             |                              |                              |                              |                              |
| Controls with 1+ hits      | 1.5                         | 2.0                         | 2.5                          | 3.0                          | 3.5                          | 4.0                          |
| 10                         | <b>3.13×10<sup>-1</sup></b> | <b>6.53×10<sup>-2</sup></b> | <b>1.04×10<sup>-2</sup></b>  | <b>1.36×10<sup>-3</sup></b>  | <b>1.57×10<sup>-4</sup></b>  | <b>1.63×10<sup>-5</sup></b>  |
| 20                         | <b>1.51×10<sup>-1</sup></b> | <b>8.49×10<sup>-3</sup></b> | <b>2.46×10<sup>-4</sup></b>  | <b>4.47×10<sup>-6</sup></b>  | 5.79×10 <sup>-8</sup>        | 5.76×10 <sup>-10</sup>       |
| 30                         | <b>7.60×10<sup>-2</sup></b> | <b>1.13×10<sup>-3</sup></b> | <b>5.54×10<sup>-6</sup></b>  | 1.23×10 <sup>-8</sup>        | 1.52×10 <sup>-11</sup>       | 1.17×10 <sup>-14</sup>       |
| 40                         | <b>3.89×10<sup>-2</sup></b> | <b>1.47×10<sup>-4</sup></b> | <b>1.11×10<sup>-7</sup></b>  | 2.62×10 <sup>-11</sup>       | 2.54×10 <sup>-15</sup>       | 1.18×10 <sup>-19</sup>       |
| 50                         | <b>1.99×10<sup>-2</sup></b> | <b>1.80×10<sup>-5</sup></b> | 1.88×10 <sup>-9</sup>        | 4.05×10 <sup>-14</sup>       | 2.49×10 <sup>-19</sup>       | 5.27×10 <sup>-25</sup>       |
| 60                         | <b>1.01×10<sup>-2</sup></b> | <b>2.06×10<sup>-6</sup></b> | 2.68×10 <sup>-11</sup>       | 4.40×10 <sup>-17</sup>       | 1.34×10 <sup>-23</sup>       | 9.40×10 <sup>-31</sup>       |
| 70                         | <b>5.06×10<sup>-3</sup></b> | <b>2.19×10<sup>-7</sup></b> | 3.11×10 <sup>-13</sup>       | 3.22×10 <sup>-20</sup>       | 3.72×10 <sup>-28</sup>       | 5.94×10 <sup>-37</sup>       |
| 80                         | <b>2.50×10<sup>-3</sup></b> | <b>2.13×10<sup>-8</sup></b> | 2.89×10 <sup>-15</sup>       | 1.52×10 <sup>-23</sup>       | 4.88×10 <sup>-33</sup>       | 1.16×10 <sup>-43</sup>       |
| b) 600 cases, 600 controls |                             |                             |                              |                              |                              |                              |
| Fisher's test              | OR                          |                             |                              |                              |                              |                              |
| Controls with 1+ hits      | 1.5                         | 2.0                         | 2.5                          | 3.0                          | 3.5                          | 4.0                          |
| 10                         | 4.19×10 <sup>-1</sup>       | 9.45×10 <sup>-2</sup>       | 1.51×10 <sup>-2</sup>        | 1.87×10 <sup>-3</sup>        | 1.89×10 <sup>-4</sup>        | 1.62×10 <sup>-5</sup>        |
| 20                         | 1.93×10 <sup>-1</sup>       | 1.13×10 <sup>-2</sup>       | 2.95×10 <sup>-4</sup>        | 4.21×10 <sup>-6</sup>        | <b>3.71×10<sup>-8</sup></b>  | <b>2.20×10<sup>-10</sup></b> |
| 30                         | 9.44×10 <sup>-2</sup>       | 1.36×10 <sup>-3</sup>       | 5.21×10 <sup>-6</sup>        | <b>7.16×10<sup>-9</sup></b>  | <b>4.30×10<sup>-12</sup></b> | <b>1.28×10<sup>-15</sup></b> |
| 40                         | 4.67×10 <sup>-2</sup>       | 1.56×10 <sup>-4</sup>       | 7.56×10 <sup>-8</sup>        | <b>8.12×10<sup>-12</sup></b> | <b>2.49×10<sup>-16</sup></b> | <b>2.56×10<sup>-21</sup></b> |
| 50                         | 2.30×10 <sup>-2</sup>       | 1.63×10 <sup>-5</sup>       | 8.61×10 <sup>-10</sup>       | <b>5.67×10<sup>-15</sup></b> | <b>6.32×10<sup>-21</sup></b> | <b>1.41×10<sup>-27</sup></b> |
| 60                         | 1.12×10 <sup>-2</sup>       | 1.54×10 <sup>-6</sup>       | <b>7.38×10<sup>-12</sup></b> | <b>2.26×10<sup>-18</sup></b> | <b>6.10×10<sup>-26</sup></b> | <b>1.69×10<sup>-34</sup></b> |
| Trend test                 |                             |                             |                              |                              |                              |                              |
| OR                         |                             |                             |                              |                              |                              |                              |
| Controls with 1+ hits      | 1.5                         | 2.0                         | 2.5                          | 3.0                          | 3.5                          | 4.0                          |
| 10                         | <b>3.12×10<sup>-1</sup></b> | <b>6.45×10<sup>-2</sup></b> | <b>1.01×10<sup>-2</sup></b>  | <b>1.30×10<sup>-3</sup></b>  | <b>1.45×10<sup>-4</sup></b>  | <b>1.46×10<sup>-5</sup></b>  |
| 20                         | <b>1.49×10<sup>-1</sup></b> | <b>8.07×10<sup>-3</sup></b> | <b>2.20×10<sup>-4</sup></b>  | <b>3.67×10<sup>-6</sup></b>  | 4.25×10 <sup>-8</sup>        | 3.69×10 <sup>-10</sup>       |
| 30                         | <b>7.36×10<sup>-2</sup></b> | <b>1.01×10<sup>-3</sup></b> | <b>4.28×10<sup>-6</sup></b>  | 7.76×10 <sup>-9</sup>        | 7.29×10 <sup>-12</sup>       | 3.97×10 <sup>-15</sup>       |
| 40                         | <b>3.67×10<sup>-2</sup></b> | <b>1.19×10<sup>-4</sup></b> | <b>6.84×10<sup>-8</sup></b>  | 1.09×10 <sup>-11</sup>       | 6.24×10 <sup>-16</sup>       | 1.47×10 <sup>-20</sup>       |
| 50                         | <b>1.82×10<sup>-2</sup></b> | <b>1.27×10<sup>-5</sup></b> | <b>8.55×10<sup>-10</sup></b> | 9.49×10 <sup>-15</sup>       | 2.35×10 <sup>-20</sup>       | 1.53×10 <sup>-26</sup>       |
| 60                         | <b>8.83×10<sup>-3</sup></b> | <b>1.23×10<sup>-6</sup></b> | 8.05×10 <sup>-12</sup>       | 4.71×10 <sup>-18</sup>       | 3.41×10 <sup>-25</sup>       | 3.55×10 <sup>-33</sup>       |

Table S11. Trend and Fisher's tests p-values for case/control datasets of two sizes: a) 800 cases, 800 controls and b) 600 cases, 600 controls. In all scenarios, each individual has 0 or 1 hits; the smaller p-value from Fisher's/Trend comparison is in bold.

$$OR = \frac{\text{Number of cases with 1 hit in pathway}}{\text{Number of controls with 1 hit in pathway}}$$

| Gene set                      | a) ASD Matched Probands vs Siblings (Sanders) |                |                   |                      |
|-------------------------------|-----------------------------------------------|----------------|-------------------|----------------------|
|                               | Trend test <i>p</i> -value                    | Cases with Hit | Controls with Hit | Emp. <i>p</i> -value |
| Module 2 <sup>a</sup>         | 0.0011                                        | 23             | 6                 | 0.0016 <sup>b</sup>  |
| All FMRP targets <sup>a</sup> | 0.0012                                        | 54             | 29                | 0.0017 <sup>b</sup>  |
| Module 4                      | 0.0045                                        | 15             | 3                 | 0.0111 <sup>b</sup>  |
| Module 1                      | 0.0066                                        | 23             | 8                 | 0.0080 <sup>b</sup>  |
| Module 3                      | 1                                             | 9              | 9                 | N/A                  |
| Gene set                      | b) ASD Probands vs Parents (Sanders)          |                |                   |                      |
|                               | Trend test <i>p</i> -value                    | Cases with Hit | Controls with Hit | Emp. <i>p</i> -value |
| Module 2 <sup>a</sup>         | 0.0008                                        | 26             | 21                | 0.0042 <sup>b</sup>  |
| All FMRP targets <sup>a</sup> | 0.0039                                        | 68             | 89                | 0.0193 <sup>b</sup>  |
| Module 4                      | 0.0650                                        | 20             | 23                | N/A                  |
| Module 1                      | 0.0514                                        | 29             | 36                | N/A                  |
| Module 3                      | N/A                                           |                |                   |                      |
| Gene set                      | c) ASD strict cases vs controls (AGP)         |                |                   |                      |
|                               | Trend test <i>p</i> -value                    | Cases with Hit | Controls with Hit | Emp. <i>p</i> -value |
| Module 2 <sup>a</sup>         | 0.0014                                        | 8              | 2                 | 0.0134 <sup>b</sup>  |
| All FMRP targets <sup>a</sup> | 2.76×10 <sup>-5</sup>                         | 20             | 9                 | 0.0009 <sup>b</sup>  |
| Module 4                      | N/A                                           |                |                   |                      |
| Module 1                      |                                               |                |                   |                      |
| Module 3                      |                                               |                |                   |                      |

**Table S12. The Trend test shows that disruptions of FMRP targets and Module 2 in particularly by rare deletion CNVs are significantly associated with ASD.** “Hits” are defined as a rare deletion CNV overlapping a pathway gene such that at least one exon from every transcript is affected. Empirical *p*-values were obtained from 10,000 random gene sets matched for gene number and length (see **Methods**). Gene sets with significant results in a) were validated in b); likewise, results validated in b) were tested for replication in c).

<sup>a</sup> = empirical *p*-value for gene set is significant for a)-c) at 5% FDR (Benjamini-Hochberg);

<sup>b</sup> = significant at 5% FDR (Benjamini-Hochberg).

| Module | Independent SNPs ( $r^2=0.5$ ) | Mean $\chi^2$ statistic | Empirical $p$ -value |
|--------|--------------------------------|-------------------------|----------------------|
| Mod1   | 4505                           | 1.205                   | 0.2879               |
| Mod2   | 3211                           | 1.289                   | 0.0062 <sup>a</sup>  |
| Mod3   | 3187                           | 1.252                   | 0.1345               |
| Mod4   | 812                            | 1.191                   | 0.4509               |

**Table S13. FMRP Mod2 is associated with ASD diagnosis based on a family-based GWAS (AGRE data), using a set-based transmission-disequilibrium test in Plink.** <sup>a</sup> = significant at 5% FDR (Benjamini-Hochberg)

| Gene Symbol     | Ensembl ID      | chr | FMRP mod | Disrupted in I- or SON-exomes, T-BCAs, Sanders or AGP CNVs | ASD cand. gene <sup>a</sup> | GO BP or CC <sup>b</sup> | MGI <sup>c</sup> |
|-----------------|-----------------|-----|----------|------------------------------------------------------------|-----------------------------|--------------------------|------------------|
| <i>ABCA3</i>    | ENSG00000167972 | 16  | 4        | San                                                        |                             |                          | BN,MA            |
| <i>ABR</i>      | ENSG00000159842 | 17  | 1        | AGP                                                        |                             | SC                       | BN,MA,NS         |
| <i>ADAP1</i>    | ENSG00000105963 | 7   | 2        | San                                                        |                             |                          |                  |
| <i>ADNP</i>     | ENSG00000101126 | 20  | 1        | SON                                                        |                             | TR                       | MA,NS,E          |
| <i>AKT3</i>     | ENSG00000117020 | 1   | 1        | San                                                        |                             |                          | BN,MA,NS         |
| <i>ALDOA</i>    | ENSG00000149925 | 16  | 2        | AGP, San                                                   |                             |                          |                  |
| <i>ANK2</i>     | ENSG00000145362 | 4   | 3        | I                                                          |                             |                          | BN,MA,NS         |
| <i>ANK3</i>     | ENSG00000151150 | 10  | 3        | T                                                          | S                           | S                        | BN,MA,NS         |
| <i>APBA1</i>    | ENSG00000107282 | 9   | 3        | San                                                        |                             | S                        | BN,MA,NS         |
| <i>ARF3</i>     | ENSG00000134287 | 12  | 2        | San                                                        |                             | SC                       |                  |
| <i>ARID1B</i>   | ENSG00000049618 | 6   | 1        | SON                                                        | S                           | CM,TR                    |                  |
| <i>ARVCF</i>    | ENSG00000099889 | 22  | 1        | AGP, San                                                   |                             |                          |                  |
| <i>ATG2A</i>    | ENSG00000110046 | 11  | 2        | San                                                        |                             |                          |                  |
| <i>ATP1B1</i>   | ENSG00000143153 | 1   | 2        | I                                                          |                             |                          | MA               |
| <i>AUTS2</i>    | ENSG00000158321 | 7   | 1        | T                                                          | A, S                        |                          |                  |
| <i>BMPR2</i>    | ENSG00000204217 | 2   | 1        | San                                                        |                             |                          | MA,E             |
| <i>BRSK1</i>    | ENSG00000160469 | 19  | 2        | AGP                                                        |                             | SC                       | BN,MA,NS         |
| <i>C19orf26</i> | ENSG00000099625 | 19  | 2        | San                                                        |                             |                          |                  |
| <i>CACNA1B</i>  | ENSG00000148408 | 9   | 4        | San                                                        | S                           |                          | BN,MA,NS         |
| <i>CDC42BPB</i> | ENSG00000198752 | 14  | 4        | SON                                                        |                             | SC                       |                  |
| <i>CDK5R2</i>   | ENSG00000171450 | 2   | 2        | San                                                        |                             |                          | BN,MA,NS,E       |
| <i>CDKL5</i>    | ENSG0000008086  | X   | 3        | T                                                          | A, B, S                     |                          |                  |
| <i>CELSR2</i>   | ENSG00000143126 | 1   | 4        | San                                                        |                             | TR                       | NS               |
| <i>CHD8</i>     | ENSG00000100888 | 14  | 1        | SON, T, San                                                | S                           | CM,TR                    | MA,E             |
| <i>CTNND2</i>   | ENSG00000169862 | 5   | 1        | San                                                        | A                           |                          | BN,NS            |
| <i>DGCR2</i>    | ENSG00000070413 | 22  | 4        | AGP, San                                                   |                             |                          |                  |
| <i>DIP2A</i>    | ENSG00000160305 | 21  | 1        | I, San                                                     |                             |                          |                  |
| <i>DIP2C</i>    | ENSG00000151240 | 10  | 1        | I                                                          |                             |                          |                  |
| <i>DOCK4</i>    | ENSG00000128512 | 7   | 1        | San                                                        |                             |                          |                  |
| <i>DPP8</i>     | ENSG00000074603 | 15  | 3        | San                                                        |                             |                          |                  |
| <i>DST</i>      | ENSG00000151914 | 6   | 3        | I                                                          |                             |                          | BN,MA,NS         |
| <i>EHMT1</i>    | ENSG00000181090 | 9   | 1        | T                                                          | B (,S)                      | CM,TR                    | BN,MA,NS,E       |
| <i>FAM115B</i>  | ENSG00000198420 | 7   | 1        | AGP                                                        |                             |                          |                  |
| <i>FAM91A1</i>  | ENSG00000176853 | 8   | 3        | I, AGP                                                     |                             |                          |                  |
| <i>FASN</i>     | ENSG00000169710 | 17  | 1        | San                                                        |                             |                          | BN,MA,NS         |
| <i>FBXL16</i>   | ENSG00000127585 | 16  | 2        | San                                                        |                             |                          |                  |
| <i>GRIN1</i>    | ENSG00000176884 | 9   | 2        | San                                                        |                             | TR,S                     | BN,MA,NS         |
| <i>GRIN2B</i>   | ENSG00000150086 | 12  | 1        | T                                                          | S                           | S                        | BN,MA,NS         |
| <i>ITPR1</i>    | ENSG00000150995 | 3   | 2        | San                                                        |                             | S                        | BN,MA,NS         |
| <i>JMJD3</i>    | ENSG00000132510 | 17  | 1        | I                                                          |                             | CM,TR                    | MA               |
| <i>KCND2</i>    | ENSG00000184408 | 7   | 0        | San                                                        |                             | S                        | BN,NS            |
| <i>KCNQ3</i>    | ENSG00000184156 | 8   | 3        | San                                                        |                             |                          | BN,MA,NS         |
| <i>KCNT1</i>    | ENSG00000107147 | 9   | 2        | AGP                                                        |                             |                          |                  |
| <i>KIAA0100</i> | ENSG00000007202 | 17  | 1        | SON                                                        |                             |                          |                  |
| <i>KIAA0430</i> | ENSG00000166783 | 16  | 3        | AGP, San                                                   |                             |                          |                  |
| <i>KIF1A</i>    | ENSG00000130294 | 2   | 2        | San                                                        |                             |                          | BN,MA,NS         |



|         |                 |    |   |          |         |          |            |
|---------|-----------------|----|---|----------|---------|----------|------------|
| KLHL22  | ENSG00000185214 | 22 |   | AGP, San |         |          |            |
| LMTK3   | ENSG00000142235 | 19 | 4 | I        |         |          |            |
| LPHN3   | ENSG00000150471 | 4  | 1 | San      |         |          |            |
| MAN2A2  | ENSG00000196547 | 15 | 2 | San      |         |          | MA         |
| MAZ     | ENSG00000103495 | 16 | 1 | AGP, San |         |          |            |
| MBD5    | ENSG00000204406 | 2  | 1 | SON, T   | B       |          |            |
| MED13L  | ENSG00000123066 | 12 | 1 | I        |         | TR       |            |
| MLL3    | ENSG00000055609 | 7  | 1 | SON, San |         | CM,TR,SC | MA         |
| MLL5    | ENSG00000005483 | 7  | 1 | I        |         | CM,TR,SC | MA         |
| MTOR    | ENSG00000198793 | 1  | 3 | San      |         | SC       | BN,MA,NS,E |
| MTSS1L  | ENSG00000132613 | 16 | 0 | San      |         |          |            |
| NAV3    | ENSG00000067798 | 12 | 1 | San      |         |          |            |
| NCDN    | ENSG00000020129 | 1  | 2 | San      |         |          | BN,MA,NS,E |
| NCKAP1  | ENSG00000061676 | 2  | 3 | I        | (S?)    |          | MA,NS,E    |
| NF1     | ENSG00000196712 | 17 | 3 | San      | A, B, S | SC       | BN,MA,NS,E |
| NLGN3   | ENSG00000196338 | X  | 4 | San      | A, B, S | S        | BN,MA,NS   |
| NOMO1   | ENSG00000103512 | 16 | 2 | AGP, San |         |          |            |
| NRXN1   | ENSG00000179915 | 2  | 3 | I        | A, B, S | S        | MA,NS      |
| PACS2   | ENSG00000179364 | 14 | 4 | San      |         |          |            |
| PGM2L1  | ENSG00000165434 | 11 | 3 | San      |         |          |            |
| PI4KA   | ENSG00000133511 | 22 |   | AGP, San |         | SC       |            |
| PIGQ    | ENSG00000007541 | 16 | 4 | San      |         |          |            |
| PLEC    | ENSG00000178209 | 8  | 2 | AGP      |         |          | BN,MA,NS   |
| PLXNB1  | ENSG00000164050 | 3  | 0 | SON      |         | SC       | NS         |
| PPP2R5B | ENSG00000068971 | 11 | 4 | San      |         |          |            |
| PREX1   | ENSG00000124126 | 20 | 0 | San      |         | SC       | BN,NS      |
| PRKACB  | ENSG00000142875 | 1  | 3 | San      |         | SC       | BN,MA,NS,E |
| PRRC2B  | ENSG00000130723 | 9  | 1 | San      |         |          |            |
| PTPRT   | ENSG00000196090 | 20 | 3 | San      |         |          |            |
| R3HDM1  | ENSG00000048991 | 2  | 3 | AGP      |         |          |            |
| RAD21L1 | ENSG00000101298 | 20 | 2 | I        |         | S        | BN,NS      |
| RALGDS  | ENSG00000160271 | 9  | 1 | AGP      |         | SC       |            |
| RELN    | ENSG00000189056 | 7  | 0 | SON      | S       |          | BN,MA,NS   |
| RTN4R   | ENSG00000040608 | 22 | 2 | AGP, San |         |          | BN,NS      |
| SCN2A   | ENSG00000136531 | 2  | 3 | SON      | S       |          |            |
| SEPT5   | ENSG00000184702 | 22 | 2 | AGP, San |         | S        | BN,NS      |
| SEZ6L2  | ENSG00000174938 | 16 | 2 | AGP, San | S       |          | BN,NS      |
| SHANK2  | ENSG00000162105 | 11 | 3 | SON, AGP | A, B, S | S,SC     |            |
| SLC8A2  | ENSG00000118160 | 19 | 2 | AGP      |         |          | BN,NS      |
| SMARCA2 | ENSG00000080503 | 9  | 1 | AGP      |         | CM,TR    | MA         |
| SMARCC2 | ENSG00000139613 | 12 | 1 | SON      |         | CM,TR    |            |
| SORL1   | ENSG00000137642 | 11 | 2 | San      |         |          | NS         |
| SPAG9   | ENSG00000008294 | 17 | 1 | San      |         | SC       |            |
| SYNGAP1 | ENSG00000197283 | 6  | 4 | AGP      | B, S    |          | BN,MA,NS   |
| TAOK2   | ENSG00000149930 | 16 | 4 | AGP, San |         | SC       |            |
| TCF25   | ENSG00000141002 | 16 | 4 | AGP      |         | TR       |            |
| TCF4    | ENSG00000196628 | 18 | 1 | T        |         | TR       | MA,NS      |
| TLE3    | ENSG00000140332 | 15 | 4 | San      |         | TR       | MA         |
| TNRC6B  | ENSG00000100354 | 22 | 1 | San      |         |          |            |
| TNS3    | ENSG00000136205 | 7  | 0 | San      |         | SC       | MA         |
| TRIM32  | ENSG00000119401 | 9  | 1 | AGP      |         |          | BN,NS      |
| TRIP12  | ENSG00000153827 | 2  | 1 | I        |         |          |            |

|                |                 |    |   |     |  |      |       |
|----------------|-----------------|----|---|-----|--|------|-------|
| <i>TRPM3</i>   | ENSG00000083067 | 9  | 0 | AGP |  |      |       |
| <i>TTYH3</i>   | ENSG00000136295 | 7  | 1 | San |  |      |       |
| <i>UBR3</i>    | ENSG00000144357 | 2  | 3 | SON |  |      | BN,MA |
| <i>ULK1</i>    | ENSG00000177169 | 12 | 4 | San |  | SC   | MA    |
| <i>UNC13C</i>  | ENSG00000137766 | 15 | 2 | San |  | S,SC | BN,NS |
| <i>WDFY3</i>   | ENSG00000163625 | 4  | 3 | I   |  |      |       |
| <i>ZCCHC14</i> | ENSG00000140948 | 16 | 1 | San |  |      |       |

**Table S14. FMRP targets disrupted in ASD by de novo single-gene mutations and rare deletion**

**CNVs.**

<sup>a</sup> = ASD candidate genes from AGP (A) [12], C. Betancur [36] and SFARI gene (S)

[<https://gene.sfari.org>; 07/01/2013].

<sup>b</sup> = GO BP or CC annotations: CM (chromatin modification, BP,0016568), TR (regulation of transcription, DNA dependent, BP,0006355), S (synapse, CC,0045202), SC (intracellular signalling cascade, BP,0007242).

<sup>c</sup> = MGI annotations: NS (nervous system phenotype), BN (behaviour/neurological phenotype), MA (mortality/aging phenotype).

| Gene Ontology gene set                                                       | Enrichment $p$ -value | Fold enrichment | Disrupted FMRP targets in gene set | Total genes in gene set |
|------------------------------------------------------------------------------|-----------------------|-----------------|------------------------------------|-------------------------|
| chromatin modification (BP,0016568) <sup>a</sup>                             | 4.48×10 <sup>-7</sup> | 14.12           | 7                                  | 280                     |
| chromatin organization (BP,0006325) <sup>a</sup>                             | 7.18×10 <sup>-6</sup> | 9.30            | 7                                  | 425                     |
| chromosome organization (BP,0051276) <sup>a</sup>                            | 3.22×10 <sup>-5</sup> | 7.38            | 7                                  | 536                     |
| plasma membrane part (CC,0044459) <sup>a</sup>                               | 5.95×10 <sup>-5</sup> | 3.19            | 13                                 | 2299                    |
| cell junction (CC,0030054) <sup>a</sup>                                      | 0.000275              | 6.42            | 6                                  | 528                     |
| cell morphogenesis (BP,0000902) <sup>a</sup>                                 | 0.000399              | 7.78            | 5                                  | 363                     |
| synapse (CC,0045202) <sup>a</sup>                                            | 0.000399              | 7.78            | 5                                  | 363                     |
| cellular component morphogenesis (BP,0032989) <sup>a</sup>                   | 0.000642              | 7.01            | 5                                  | 403                     |
| regulation of transcription DNA dependent (BP,0006355) <sup>a</sup>          | 0.000671              | 3.15            | 10                                 | 1790                    |
| regulation of RNA metabolic process (BP,0051252) <sup>a</sup>                | 0.000821              | 3.08            | 10                                 | 1836                    |
| cell part morphogenesis (BP,0032990) <sup>a</sup>                            | 0.001033              | 8.79            | 4                                  | 257                     |
| neuron projection development (BP,0031175) <sup>a</sup>                      | 0.001079              | 8.69            | 4                                  | 260                     |
| positive regulation of transcription DNA dependent (BP,0045893) <sup>a</sup> | 0.001512              | 5.79            | 5                                  | 488                     |
| positive regulation of RNA metabolic process (BP,0051254) <sup>a</sup>       | 0.001568              | 5.74            | 5                                  | 492                     |
| regulation of transcription from RNA polymerase II promoter (BP,0006357)     | 0.001623              | 4.58            | 6                                  | 740                     |
| neuron projection (CC,0043005) <sup>a</sup>                                  | 0.002876              | 6.64            | 4                                  | 340                     |
| neuron development (BP,0048666) <sup>a</sup>                                 | 0.002938              | 6.60            | 4                                  | 342                     |
| positive regulation of transcription (BP,0045941) <sup>a</sup>               | 0.003118              | 4.90            | 5                                  | 576                     |
| positive regulation of gene expression (BP,0010628) <sup>a</sup>             | 0.003533              | 4.76            | 5                                  | 593                     |
| negative regulation of transcription DNA dependent (BP,0045892)              | 0.003638              | 6.22            | 4                                  | 363                     |

**Table S15. GO biological process (BP) and cellular component (CC) terms significantly enriched among FMRP targets disrupted by *de novo* single-gene mutations from I-exomes, SON-exomes and T-BCAs against all genes in the genome at 5% FDR (Benjamini-Hochberg).<sup>a</sup> = enrichments replicated against a background of all genes disrupted by *de novo* single-gene mutations from I-exomes, SON-exomes and T-BCAs at 5% FDR.**

| Gene Ontology gene set                                               | Enrichment $p$ -value | Fold enrichment | Disrupted FMRP targets in gene set | Total genes in gene set |
|----------------------------------------------------------------------|-----------------------|-----------------|------------------------------------|-------------------------|
| transmission of nerve impulse (BP,0019226)                           | $1.13 \times 10^{-6}$ | 7.18            | 10                                 | 351                     |
| synaptic transmission (BP,0007268)                                   | $2.61 \times 10^{-6}$ | 7.58            | 9                                  | 299                     |
| membrane bounded vesicle (CC,0031988)                                | $1.58 \times 10^{-5}$ | 4.78            | 11                                 | 580                     |
| intracellular signaling cascade (BP,0007242)                         | $3.70 \times 10^{-5}$ | 3.09            | 16                                 | 1305                    |
| cytoplasmic membrane bounded vesicle (CC,0016023)                    | $6.84 \times 10^{-5}$ | 4.48            | 10                                 | 562                     |
| vesicle (CC,0031982)                                                 | $7.02 \times 10^{-5}$ | 4.06            | 11                                 | 683                     |
| regulation of small GTPase mediated signal transduction (BP,0051056) | $8.39 \times 10^{-5}$ | 6.66            | 7                                  | 265                     |
| synapse (CC,0045202)                                                 | $9.04 \times 10^{-5}$ | 5.55            | 8                                  | 363                     |
| cytoplasmic vesicle (CC,0031410)                                     | 0.000237              | 3.85            | 10                                 | 654                     |
| synapse part (CC,0044456)                                            | 0.000494              | 5.98            | 6                                  | 253                     |
| metal ion transport (BP,0030001)                                     | 0.0005                | 4.32            | 8                                  | 467                     |
| cell cell signaling (BP,0007267)                                     | 0.000684              | 3.69            | 9                                  | 615                     |
| cation transport (BP,0006812)                                        | 0.001615              | 3.60            | 8                                  | 560                     |
| neuron projection (CC,0043005)                                       | 0.00226               | 4.45            | 6                                  | 340                     |
| regulation of phosphorylation (BP,0042325)                           | 0.002662              | 3.72            | 7                                  | 474                     |
| regulation of protein kinase activity (BP,0045859)                   | 0.002724              | 4.28            | 6                                  | 353                     |
| regulation of kinase activity (BP,0043549)                           | 0.003213              | 4.14            | 6                                  | 365                     |
| regulation of phosphate metabolic process (BP,0019220)               | 0.00331               | 3.58            | 7                                  | 493                     |
| regulation of phosphorus metabolic process (BP,0051174)              | 0.00331               | 3.58            | 7                                  | 493                     |
| ion transport (BP,0006811)                                           | 0.003399              | 2.92            | 9                                  | 776                     |
| regulation of transferase activity (BP,0051338)                      | 0.003964              | 3.97            | 6                                  | 381                     |

**Table S16. GO biological process (BP) and cellular component (CC) terms significantly enriched among FMRP targets disrupted by rare deletion CNVs in ASD probands from AGP and Sanders datasets against all genes in the genome at 5% FDR (Benjamini-Hochberg).** All significant enrichments were replicated against a background of all genes disrupted by rare deletion CNVs in ASD probands from AGP and Sanders datasets at 5% FDR.
